# Supplementary material
Source: PubMed Central journal article supplement (PMC3111148)
Supplement: supp_data.pdf [file supp_data.pdf]

SUPPLEMENTAL TABLE 1. CLINICAL PARAMETERS AND HLA GENOTYPES OF THE COHORT OF 41 CHRONICALLY HIV-INFECTED SOUTH AFRICAN ADULTS<sup>a</sup>

| No | PID   | CD4  | VL      | A1   | A2   | B1   | B2   | C1   | C2   | DRB1 A1 | DRB1 A2 |
|----|-------|------|---------|------|------|------|------|------|------|---------|---------|
| 1  | SK011 | 325  | 123,000 | 0205 | 6801 | 4201 | 5801 | 0701 | 1700 | 0302    | 1102    |
| 2  | SK018 | 83   | 400,000 | 0201 | 3303 | 0702 | 4501 | 0702 | 1601 | 0701    | 1301    |
| 3  | SK021 | 163  | 387,000 | 3002 | 6601 | 4201 | 5802 | 0602 | 1700 | 1503    | 1101    |
| 4  | SK022 | 577  | 5,690   | 2402 | 6802 | 0702 | 4201 | 0702 | 1700 | 1503    | 1102    |
| 5  | SK036 | 32   | 313000  | 2402 | 6802 | 0801 | 1406 | 0702 | 0802 | 0701    | 1301    |
| 6  | SK060 | 909  | 941     | 7400 | 8001 | 1503 | 1801 | 0202 | 0210 | 0701    | 1301    |
| 7  | SK086 | 8    | 22400   | 2301 | 2902 | 0801 | 1510 | 0205 | 0304 | 0404    | 0301    |
| 8  | SK090 | 53   | 98,400  | 2402 | 6601 | 0705 | 4501 | 0602 | 1505 | 0102    | 1001    |
| 9  | SK102 | 196  | 298,000 | 0301 | 3001 | 1510 | 5301 | 0304 | 0401 | 1001    | 0804    |
| 10 | SK106 | 1020 | 59,200  | 3001 | 6802 | 0702 | 1401 | 0304 | 0804 | 1503    | 1503    |
| 11 | SK149 | 320  | 40800   | 2301 | 4301 | 1402 | 5802 | 0602 | 0802 | 0301    | 1401    |
| 12 | SK150 | 314  | 13900   | 0201 | 6802 | 0801 | 1510 | 0701 | 0804 | 1001    | 1101    |
| 13 | SK157 | 182  | 473,000 | 2911 | 3201 | 0702 | 1302 | 0602 | 0702 | 1501    | 1201    |
| 14 | SK171 | 117  | 750,000 | 0301 | 6802 | 1510 | 5802 | 0304 | 0602 | 0405    | 0701    |
| 15 | SK175 | 977  | 439     | 0201 | 3002 | 1801 | 3910 | 1203 | 1203 | 1104    | 1301    |
| 16 | SK183 | 189  | 750,000 | 0101 | 7400 | 5703 | 8100 | 0701 | 1800 | 1201    | 1303    |
| 17 | SK203 | 1466 | 50      | 0205 | 6802 | 1510 | 5801 | 0304 | 0701 | 0302    | 1102    |
| 18 | SK229 | 310  | 52300   | 0101 | 3303 | 5301 | 8100 | 0401 | 1800 | 0102    | 0804    |
| 19 | SK233 | 18   | 79700   | 2902 | 3402 | 4403 | 4403 | 0401 | 0701 | 1101    | 1301    |
| 20 | SK253 | 51   | 89,100  | 0301 | 2301 | 0801 | 1510 | 0701 | 1601 | 1101    | 1101    |
| 21 | SK256 | 861  | 15,000  | 3002 | 3002 | 5802 | 8100 | 0602 | 0701 | 1201    | 1101    |
| 22 | SK265 | 35   | 488000  | 0205 | 6802 | 1510 | 5801 | 0304 | 0701 | 1001    | 1102    |
| 23 | SK266 | 327  | 750000  | 3001 | 6802 | 0702 | 4202 | 0702 | 1700 | 1503    | 1301    |
| 24 | SK274 | 910  | 6,450   | 3402 | 6601 | 4403 | 5802 | 0401 | 0602 | 0302    | 1301    |
| 25 | SK280 | 738  | 663     | 2301 | 4301 | 1503 | 4501 | 0602 | 1800 | 0102    | 0301    |
| 26 | SK292 | 317  | 5070    | 0201 | 3002 | 3910 | 4001 | 0304 | 1203 | 1301    | 1407    |
| 27 | SK295 | 16   | 338000  | 0205 | 0205 | 5801 | 5801 | 0701 | 0701 | 1102    | 1102    |
| 28 | SK304 | 934  | 112,000 | 2301 | 2301 | 1503 | 5301 | 0210 | 0304 | 0301    | 1102    |
| 29 | SK307 | 805  | 441     | 3303 | 7400 | 1503 | 5301 | 0210 | 0401 | 0302    | 1101    |
| 30 | SK317 | 103  | 750,000 | 2301 | 3301 | 4201 | 4403 | 0303 | 1700 | 0901    | 0302    |
| 31 | SK326 | 328  | 273000  | 0301 | 3402 | 0801 | 1503 | 0210 | 0702 | 0804    | 0302    |
| 32 | SK327 | 174  | 157,000 | 2902 | 3004 | 1302 | 2705 | 0202 | 0602 | 1201    | 1201    |
| 33 | SK334 | 165  | 750,000 | 3001 | 6802 | 4202 | 5801 | 0304 | 1700 | 1201    | 1101    |
| 34 | SK356 | 309  | 120000  | 0301 | 6801 | 3501 | 5802 | 0401 | 0602 | 0401    | 1102    |
| 35 | SK358 | 316  | 59100   | 0202 | 2301 | 0801 | 5701 | 0701 | 0701 | 0102    | 1302    |
| 36 | SK392 | 169  | 750,000 | 0201 | 3001 | 4201 | 5301 | 0401 | 1700 | 0804    | 0302    |
| 37 | SK394 | 320  | 49300   | 0301 | 6801 | 5801 | 5802 | 0602 | 0602 | 1503    | 1301    |
| 38 | SK399 | 913  | 2,520   | 0301 | 2402 | 0702 | 5802 | 0602 | 0702 | 1503    | 1301    |
| 39 | SK410 | 310  | 234000  | 0205 | 3002 | 4201 | 4403 | 0701 | 1700 | 0302    | 1101    |
| 40 | SK428 | 306  | 79500   | 0205 | 0205 | 1401 | 5801 | 0701 | 0804 | 1102    | 1301    |
| 41 | SK444 | 325  | 123,000 | 0205 | 3303 | 0702 | 5802 | 0602 | 0702 | 0401    | 0901    |

<sup>a</sup>PID, patient identification; CD4, CD4 cells/ $\mu$ l blood; VL, viral load; HLA type is listed by loci.

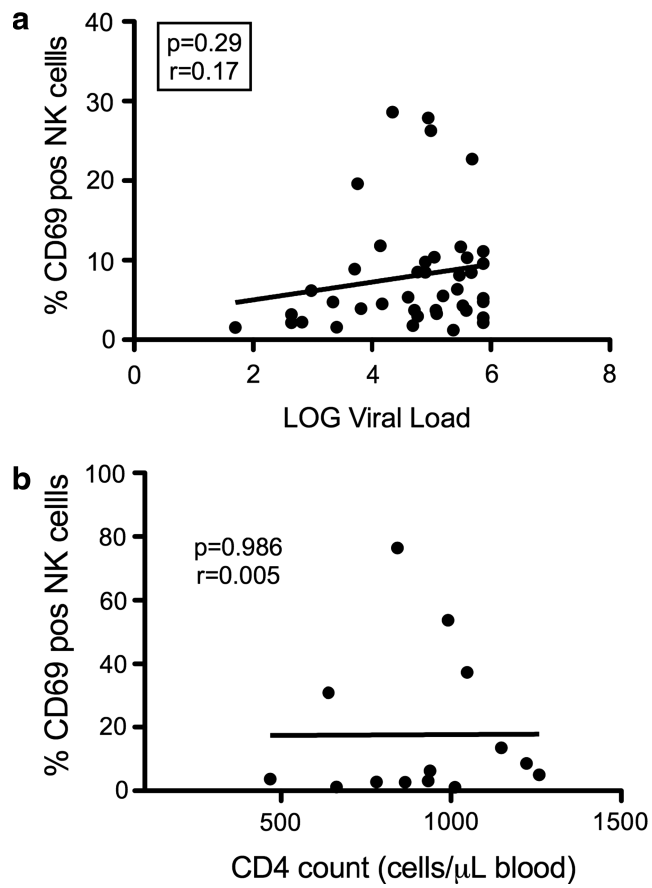

**SUPPLEMENTAL FIG. 1.** No significant correlation between CD4 cell count and frequency of CD69pos NK cells. (a) Percentage CD69pos NK cells vs. viral load. (b) Healthy HIV-negative subjects.
